# Supplementary material for: Enhanced hydrogenation of ethyl-levulinate to γ-valerolactone over NiδOx stabilized Cu+ surface sites
Source: Royal Society of Chemistry journal article supplement (doi:10.1039/c6ra16816g), 2016-01-01
Supplement: c6ra16816g1.pdf [file c6ra16816g1.pdf]

**Supporting Online Information**

**Enhanced Hydrogenation of Ethyl-levulinate to  $\gamma$ -valerolactone over  
 $\text{Ni}^{\delta}\text{O}_x$  Stabilized  $\text{Cu}^+$  surface sites**

Junhua Zhu,<sup>a,b</sup> Yi Tang,<sup>\*a</sup> and Kangjian Tang,<sup>\*b</sup>

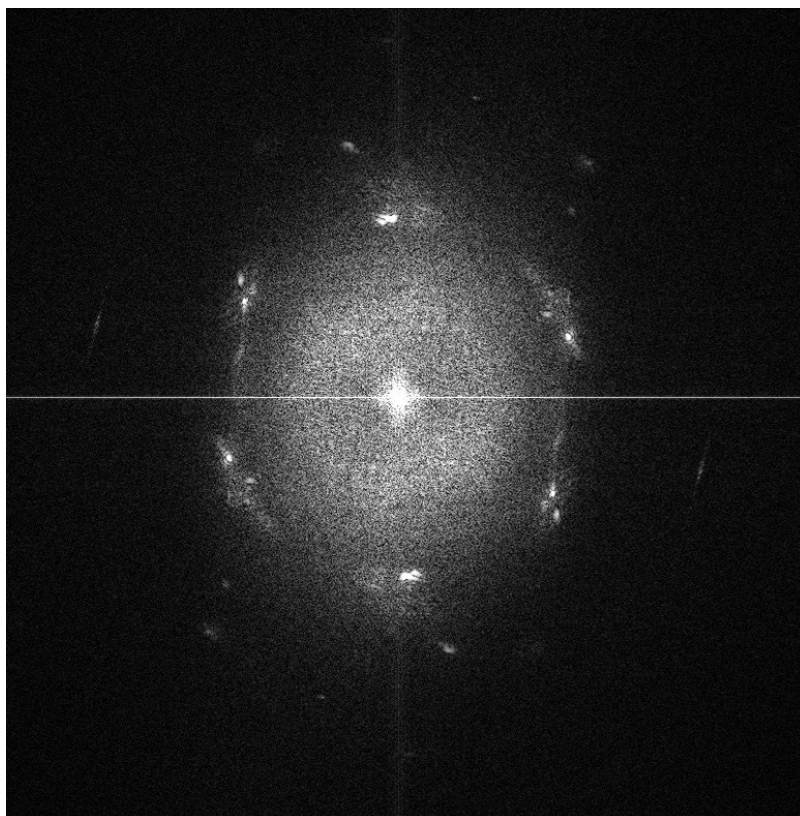

**Figure.S1** *The FFT on a selected nano-particle*

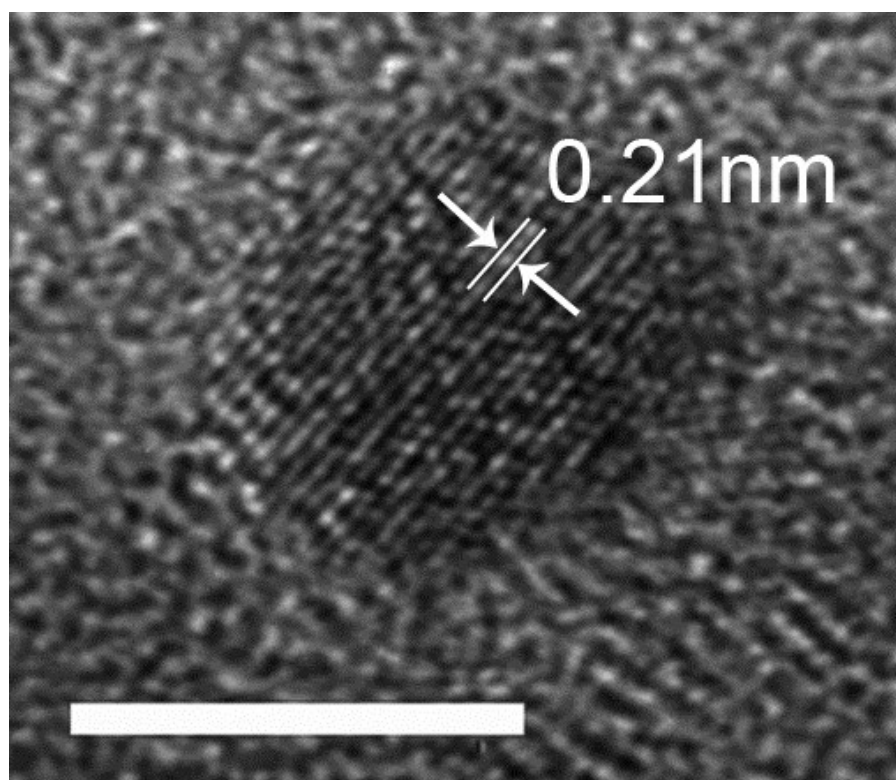

**Figure.S2** HRTEM image of focused nanoparticle. The lattice with the distance of 0.21nm corresponds to Cu (111) planes . The scaled bar is 2nm.

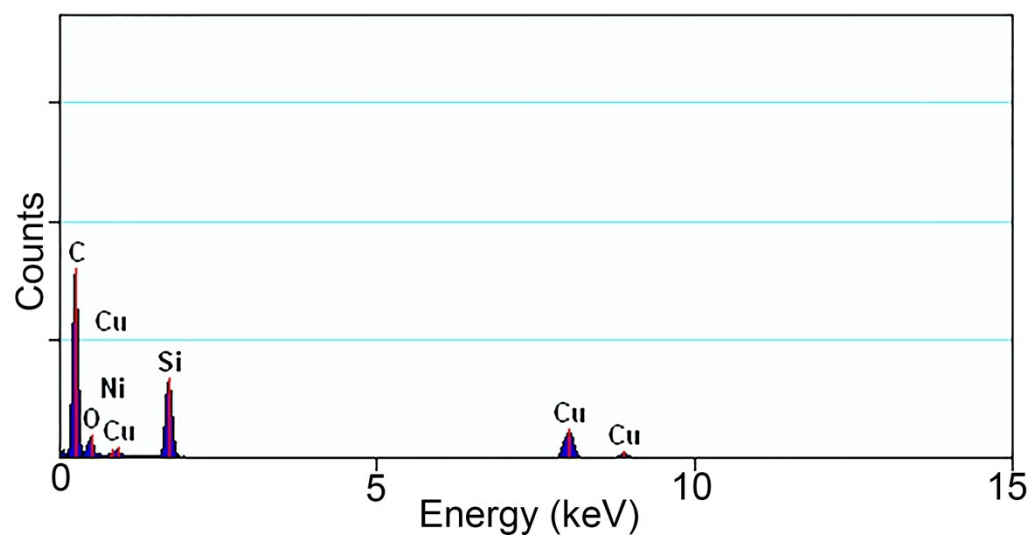

**Figure.S3** EDS result on a nano-cluster of Cu(35%)Ni(4%)/SiO<sub>2</sub> catalyst

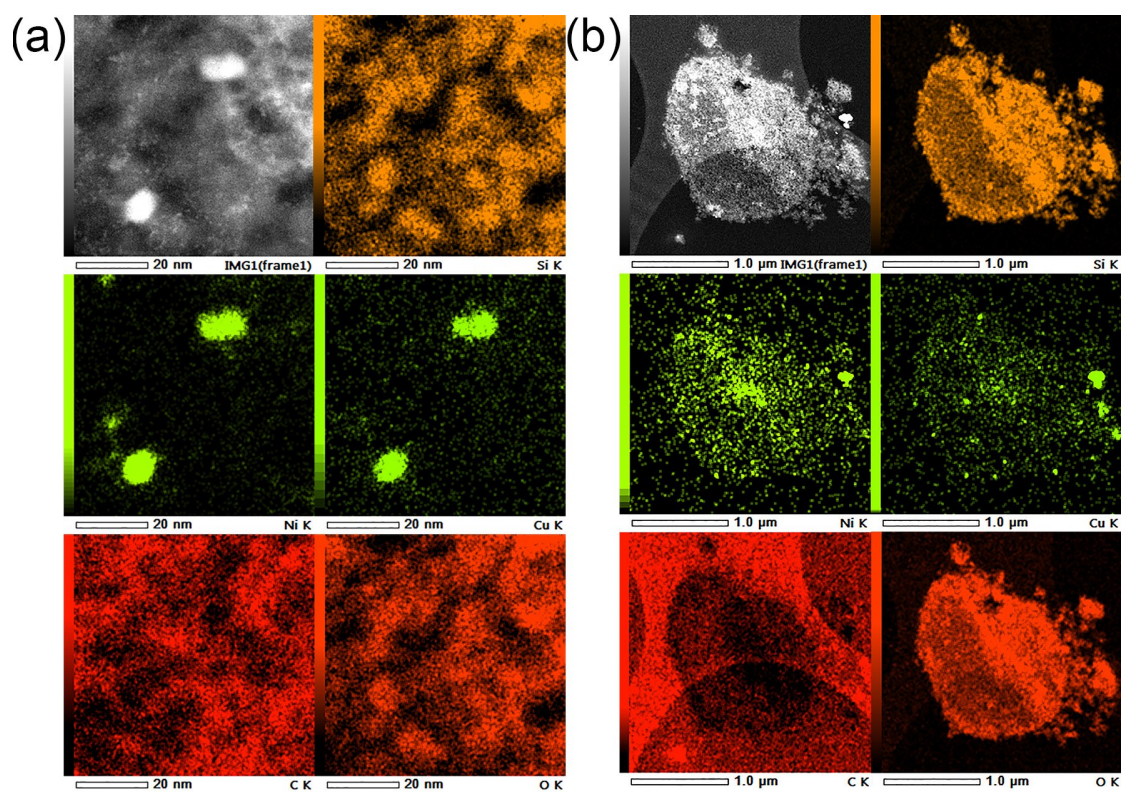

**Figure.S4** EDS mappings on (a) 20nm scale and (b)1000nm scale. Each figure Includes HAADF image, Si, Ni, Cu, C and O co

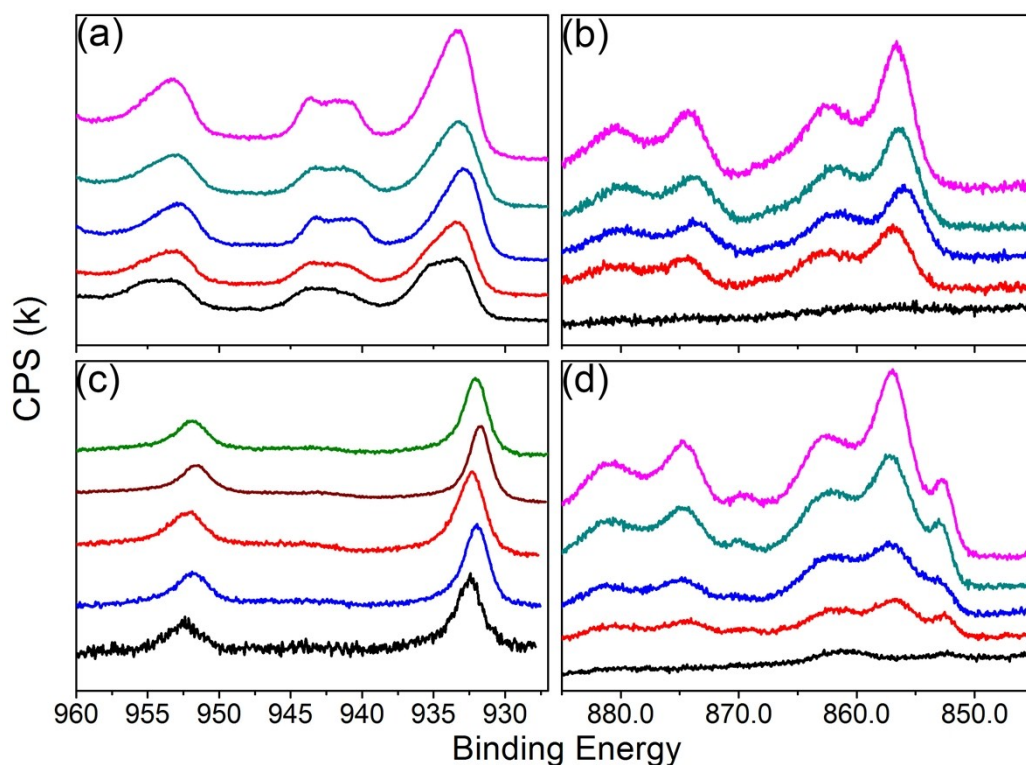

**Figure.S5** Cu2p XPS diagram of (a) before and (c) after reduction; Ni2p3/2 XPS diagram of (b) before and (d) after reduction. Seen from (a) and (b), the copper and nickel has fully Cu<sup>2+</sup> and Ni<sup>2+</sup>, respectively. (c) After reduction by H<sub>2</sub>, Cu<sup>2+</sup> was reduced completely. To deffer Cu<sup>+</sup> or Cu<sup>0</sup> remained, auger electronic spectrom (AES) was carried out to detect the state of reduced copper. See the AES result on Figure S4 and Table S1. (d) There has much Ni<sup>2+</sup> remained even after reduction. One new peak occurred at about 853eV, implying the Ni<sup>2+</sup> was partly reduced. Comparing to the standard Ni<sup>0</sup> of 852.3eV. The nickel possessed a state of (0≤δ<2). Series of CuNi/SiO<sub>2</sub> catalysts with different Ni content were showed as different color. black line: Ni(0%), red line: Ni(2%), blue line: Ni(4%), green line: Ni(6%), pink line: Ni(8%). See direct numeral data of Ni2p3/2 XPS on table S2.

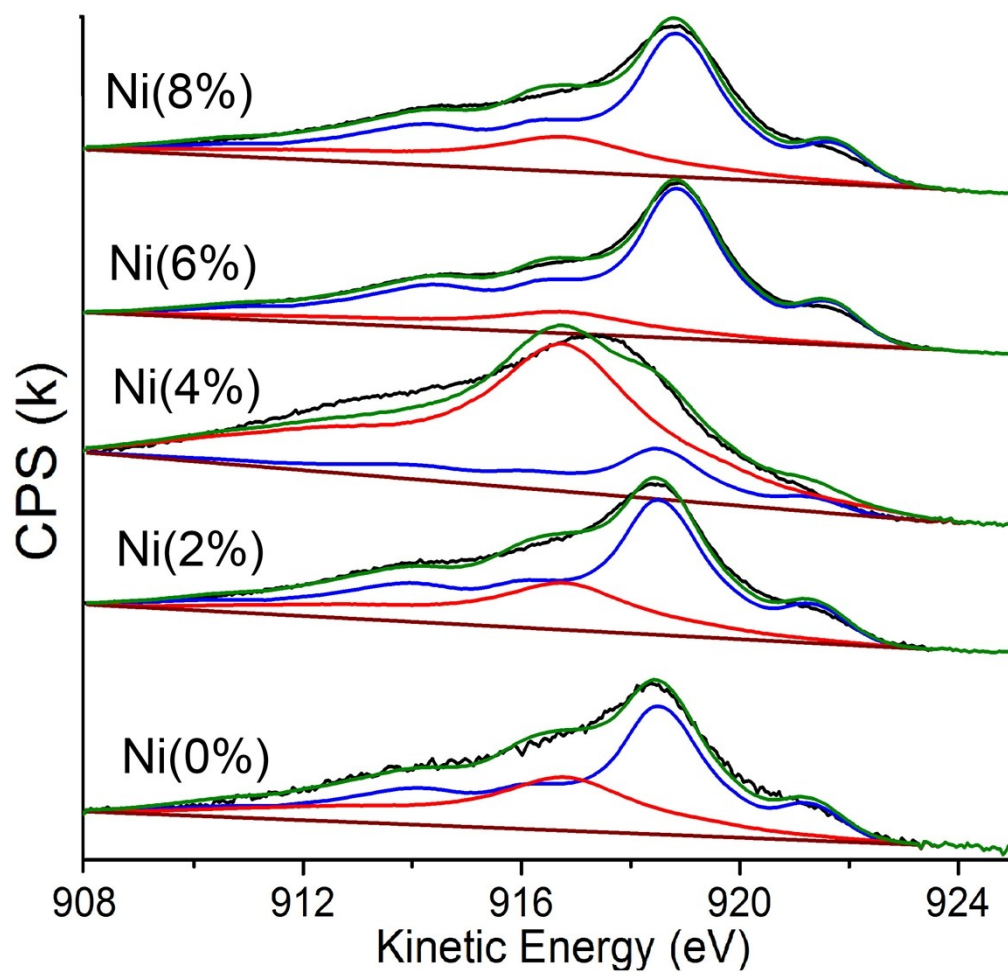

**Figure.S6** The Cu 2p AES diagrams with different Ni content after reduction. Brown line: base; red line: Cu<sup>+</sup>; blue line: Cu<sup>0</sup>; green line: envelope; black line: real cps.

**Table S1** The Cu LMM XAES result of catalysts with different Ni content after reduction

| Catalyst                   | KE (eV)         |                 | $\alpha'$ (eV)  |                 | $X_{Cu^+}^a$ % | $X_{Cu^0}^a$ % |
|----------------------------|-----------------|-----------------|-----------------|-----------------|----------------|----------------|
|                            | Cu <sup>+</sup> | Cu <sup>0</sup> | Cu <sup>+</sup> | Cu <sup>0</sup> |                |                |
| Cu-Ni(0%)/SiO <sub>2</sub> | 916.0           | 918.7           | 1848.4          | 1850.8          | 28.35          | 71.65          |
| Cu-Ni(2%)/SiO <sub>2</sub> | 915.6           | 918.3           | 1848.3          | 1851.0          | 33.46          | 66.54          |
| Cu-Ni(4%)/SiO <sub>2</sub> | 915.7           | 918.5           | 1848.0          | 1850.8          | 79.19          | 20.81          |
| Cu-Ni(6%)/SiO <sub>2</sub> | 915.7           | 918.4           | 1848.3          | 1851.0          | 23.33          | 76.67          |
| Cu-Ni(8%)/SiO <sub>2</sub> | 915.5           | 918.5           | 1848.3          | 1851.3          | 15.06          | 84.94          |

a : Intensity ratio of Cu<sup>+</sup>(or Cu<sup>0</sup>)/(Cu<sup>+</sup>+Cu<sup>0</sup>) by deconvolution of Cu LMM XAES spectra



**Table S2** The Ni 2p<sub>3/2</sub> binding energy of catalysts with different Ni content before and after reduction

| Catalyst                   | before reduction          | after reduction           |                           |
|----------------------------|---------------------------|---------------------------|---------------------------|
|                            | Ni 2p <sub>3/2</sub> , eV | Ni 2p <sub>3/2</sub> , eV | Ni 2p <sub>3/2</sub> , eV |
| Cu-Ni(0)/SiO <sub>2</sub>  | -                         | -                         | -                         |
| Cu-Ni(2%)/SiO <sub>2</sub> | 856.7                     | 856.9                     | 852.6                     |
| Cu-Ni(4%)/SiO <sub>2</sub> | 855.8                     | 857.4                     | 853.2                     |
| Cu-Ni(6%)/SiO <sub>2</sub> | 856.5                     | 857.0                     | 853.0                     |
| Cu-Ni(8%)/SiO <sub>2</sub> | 856.7                     | 856.9                     | 852.8                     |
| NiO <sup>a</sup>           | 853.3                     | -                         | -                         |
| Ni <sup>a</sup>            | -                         | -                         | 852.3                     |

a : the binding energy data of NiO and Ni referring to the handbook of XPS

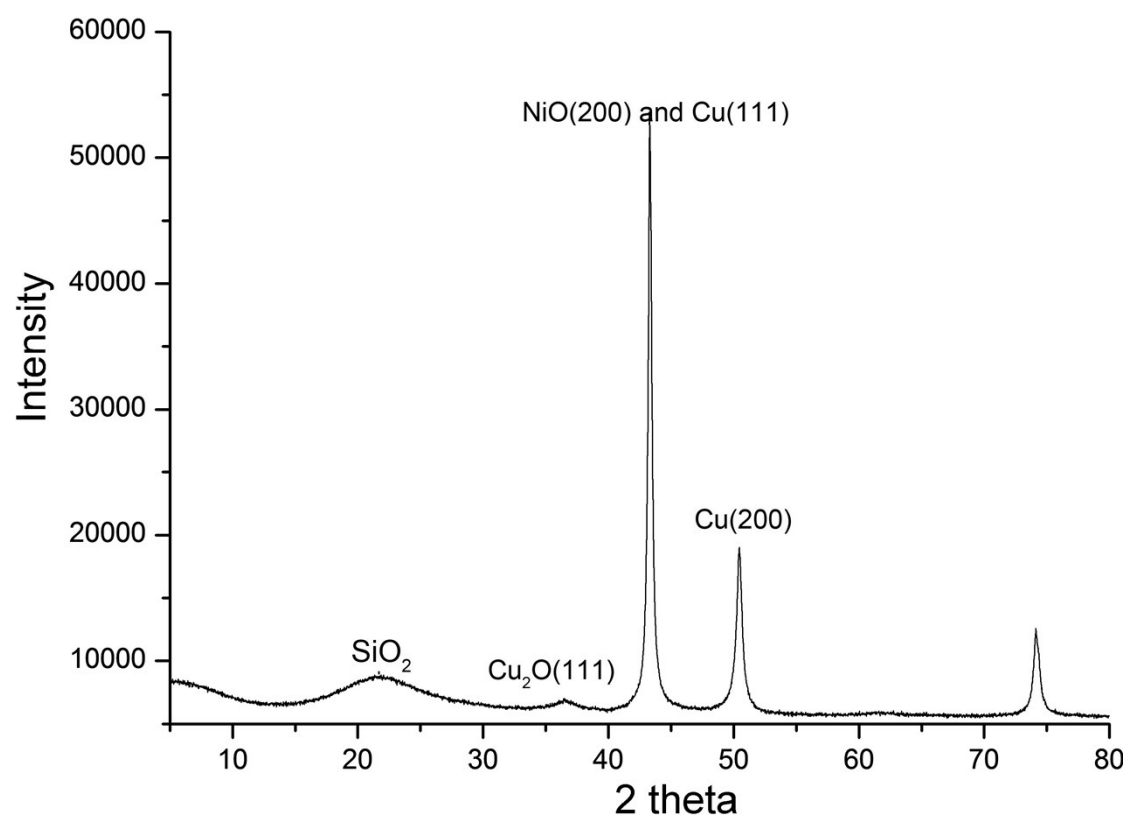

**Figure.S7** XRD curve of CuNi<sup>δ</sup>O<sub>x</sub>/SiO<sub>2</sub> catalyst after 200 hours' reaction.

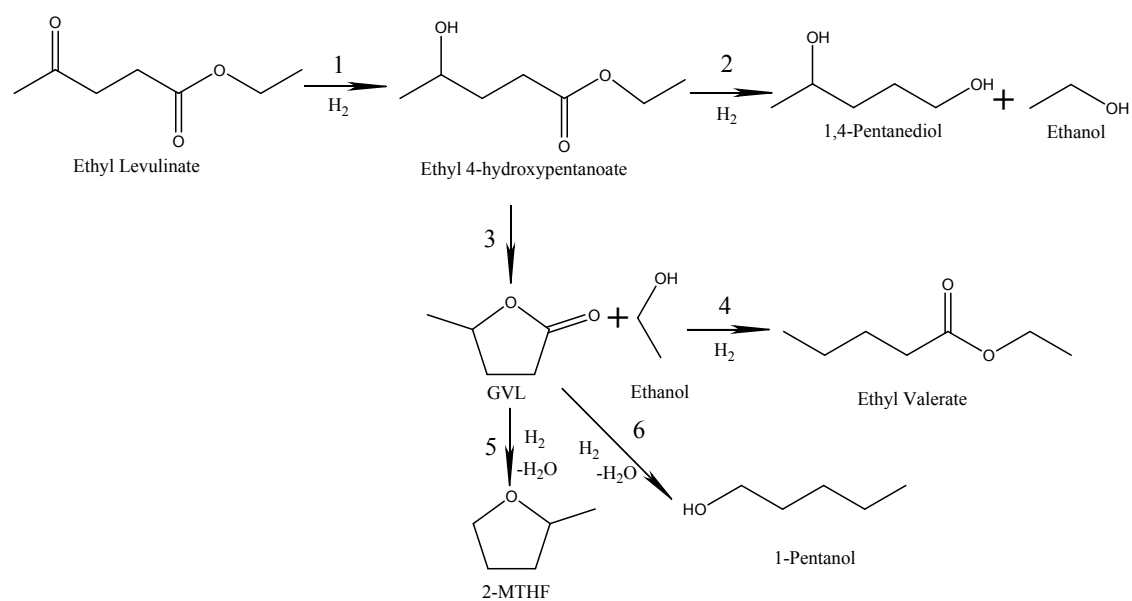

**Scheme S1.** The proposed reaction pathways of EL hydrogenation.
